# Supplementary figures and images for: Identification of a Ten-Gene Signature of DNA Damage Response Pathways with Prognostic Value in Esophageal Squamous Cell Carcinoma
Source: Hindawi journal article supplement (doi:10.1155/2021/3726058), 2021-12-22

a

Survival probability

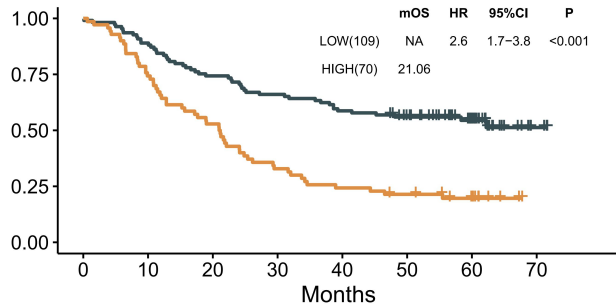

b

Survival probability

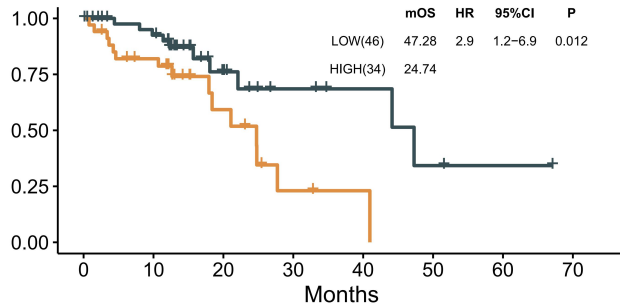

Supplement: f1 [file 3726058.f1.zip]

**a**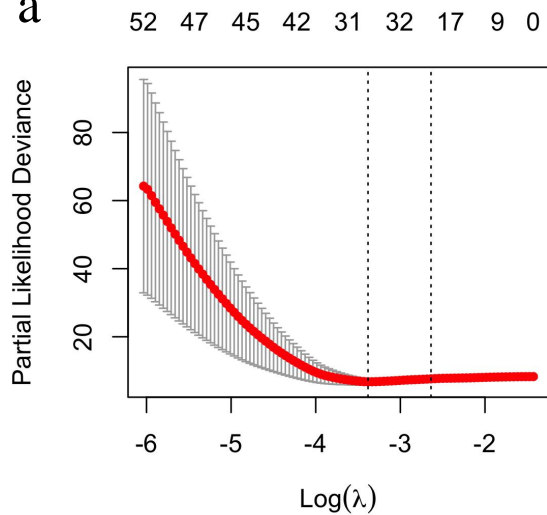**b**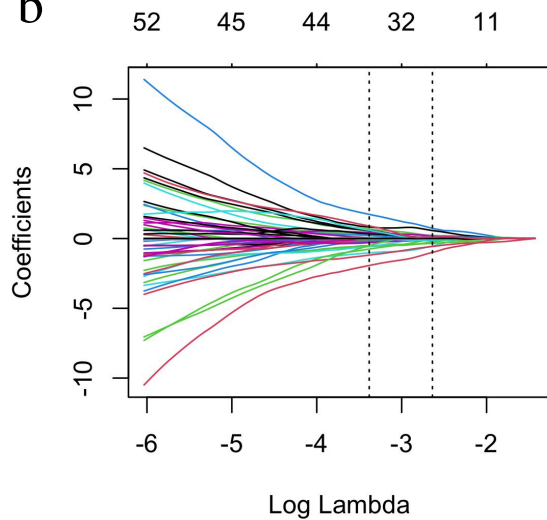**c**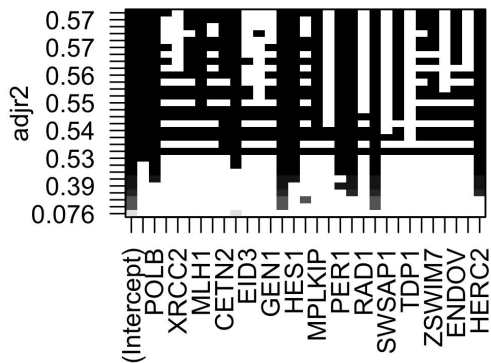**d**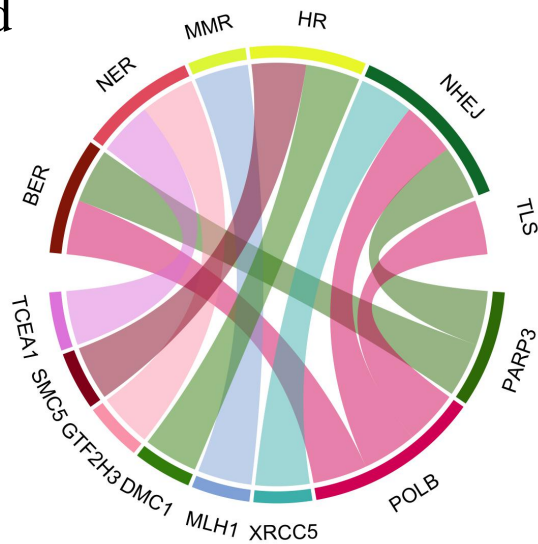

Supplement: f1 [file 3726058.f1.zip]
